# Supplementary material for: A new supramolecular semiconductor palladium(ii) complex [(CH3)3N(CH2)3Br]2Pd2Cl6: structural study, optical and electrical properties
Source: Royal Society of Chemistry journal article supplement (doi:10.1039/d3nj00851g), 2023-01-01
Supplement: d3nj00851g1.pdf [file d3nj00851g1.pdf]

**Supplementary Information for:**

**A new supramolecular semi-conductor palladium (II) complex  
[(CH<sub>3</sub>)<sub>3</sub>N(CH<sub>2</sub>)<sub>3</sub>Br]<sub>2</sub>Pd<sub>2</sub>Cl<sub>6</sub>: Structural study, optical and electrical  
properties**

Imen Dakhlaoui <sup>a</sup>, Karim Karoui <sup>b, c</sup>, Fadhel Hajlaoui <sup>d</sup>, Nathalie Audebrand <sup>e</sup>, Marie Dallon<sup>e</sup>,  
Fathi Jomni <sup>a</sup>

<sup>a</sup> Université de Tunis El Manar, Laboratoire LMOP, LR99ES17, El Manar, 2092 Tunis,  
Tunisia

<sup>b</sup> Laboratoire des caractérisations spectroscopiques et optique des matériaux, Faculté des  
Sciences de Sfax, B.P. 1171, 3000 Sfax, Université de Sfax, Tunisia

<sup>c</sup> Greman UMR 7347-CNRS, CEA, INSACVL, University of Tours, Blois, France

<sup>d</sup> Laboratoire Physico-chimie de l'Etat Solide, Département de Chimie, Faculté des  
Sciences de Sfax, B.P. 1171, 3000 Sfax, Université de Sfax, Tunisia

<sup>e</sup> Univ Rennes, CNRS, INSA Rennes, ISCR (Institut des Sciences Chimiques de Rennes) - UMR  
6226, F-35000 Rennes, France

*\*Corresponding Authors' E-mail: karouikarim36@yahoo.com*

**Table of Content:**

**Table S1.** Selected bond distances (Å) and angles (°) for [(CH<sub>3</sub>)<sub>3</sub>N(CH<sub>2</sub>)<sub>3</sub>Br]<sub>2</sub>Pd<sub>2</sub>Cl<sub>6</sub>.

**Table S2.** Hydrogen-bonding geometry (Å, °) for [(CH<sub>3</sub>)<sub>3</sub>N(CH<sub>2</sub>)<sub>3</sub>Br]<sub>2</sub>Pd<sub>2</sub>Cl<sub>6</sub>.

**Table S1.** Selected bond distances (Å) and angles (°) for  $[(\text{CH}_3)_3\text{N}(\text{CH}_2)_3\text{Br}]_2\text{Pd}_2\text{Cl}_6$ .

| Distances (Å)           |           | Angles (°)                  |            |
|-------------------------|-----------|-----------------------------|------------|
| Pd1–Cl1                 | 2.267(4)  | Cl2–Pd1–Cl1                 | 92.14(16)  |
| Pd1–Cl2                 | 2.264(4)  | Cl2–Pd1–Cl3 <sup>(i)</sup>  | 176.91(19) |
| Pd1–Cl3                 | 2.321(5)  | Cl1–Pd1–Cl3 <sup>(i)</sup>  | 90.78(17)  |
| Pd1–Cl3 <sup>(i)</sup>  | 2.306(5)  | Cl2–Pd1–Cl3                 | 90.84(17)  |
| Pd2–Cl4                 | 2.273(4)  | Cl1–Pd1–Cl3                 | 177.02(18) |
| Pd2–Cl5                 | 2.264(4)  | Cl3 <sup>(i)</sup> –Pd1–Cl3 | 86.23(18)  |
| Pd2–Cl6                 | 2.329(4)  | Pd1 <sup>(i)</sup> –Cl3–Pd1 | 93.77(18)  |
| Pd2–Cl6 <sup>(ii)</sup> | 2.335(4)  | Cl5–Pd2–Cl4                 | 91.81(16)  |
| N1–C6                   | 1.49(2)   | Cl5–Pd2–Cl6                 | 91.74(15)  |
| N1–C3                   | 1.50(2)   | Cl4–Pd2–Cl6                 | 176.39(16) |
| N1–C5                   | 1.503(18) | Cl5–Pd2–Cl6 <sup>(ii)</sup> | 176.04(17) |
| N1–C4                   | 1.51(2)   | Cl4–Pd2–Cl6 <sup>(ii)</sup> | 90.97(15)  |
| C1–C2                   | 1.53(2)   | Cl6–Pd2–Cl6 <sup>(ii)</sup> | 85.45(14)  |
| C2–C3                   | 1.49(2)   | Pd2–Cl6–Pd2 <sup>(ii)</sup> | 94.55(14)  |
| Br2A–C7A                | 1.97(5)   | C6–N1–C3                    | 109.5(13)  |
| Br1–C1                  | 1.950(17) | C6–N1–C5                    | 108.1(13)  |
| C7A–C8A                 | 1.49(5)   | C3–N1–C5                    | 112.8(13)  |
| C8A–C9A                 | 1.14(4)   | C6–N1–C4                    | 107.0(13)  |
| C9A–N2A                 | 1.73(6)   | C3–N1–C4                    | 110.1(13)  |
| N2A–C12A                | 1.37(6)   | C5–N1–C4                    | 109.1(12)  |
| N2A–C10A                | 1.46(8)   | C2–C1–Br1                   | 112.1(13)  |
| N2A–C11A                | 1.55(6)   | C3–C2–C1                    | 112.6(16)  |
| Br2B–C7B                | 1.90(4)   | C2–C3–N1                    | 116.1(13)  |
| C7B–C8B                 | 1.55(5)   | C8B–C7B–Br2B                | 110(2)     |
| C8B–C9B                 | 1.37(4)   | N2B–C9B–C8B                 | 139(4)     |
| C9B–N2B                 | 1.37(6)   | C9B–N2B–C10B                | 116(5)     |
| N2B–C11B                | 1.42(7)   | C9B–N2B–C12B                | 107(4)     |
| N2B–C10B                | 1.52(8)   | C10B–N2B–C12B               | 101(4)     |
| N2B–C12B                | 1.68(6)   | C8A–C7A–Br2A                | 110(3)     |
|                         |           | C9A–C8A–C7A                 | 118(4)     |
|                         |           | C8A–C9A–N2A                 | 126(3)     |
|                         |           | C12A–N2A–C10A               | 116(5)     |
|                         |           | C12A–N2A–C11A               | 111(4)     |
|                         |           | C10A–N2A–C11A               | 114(4)     |
|                         |           | C12A–N2A–C9A                | 106(3)     |
|                         |           | C10A–N2A–C9A                | 112(4)     |
|                         |           | C11A–N2A–C9A                | 96(3)      |
|                         |           | C9B–C8B–C7B                 | 124(3)     |
|                         |           | C9B–N2B–C11B                | 125(5)     |
|                         |           | C11B–N2B–C10B               | 105(5)     |

|                  |           |
|------------------|-----------|
| C11B–N2B–C12B    | 101(4)    |
| Br1–C1–C2–C3     | 61(2)     |
| C4–N1–C3–C2      | 64.0(19)  |
| C8A–C9A–N2A–C12A | 136(4)    |
| C7B–C8B–C9B–N2B  | 136(5)    |
| C8B–C9B–N2B–C12B | 132(5)    |
| C1–C2–C3–N1      | 170.9(15) |
| Br2A–C7A–C8A–C9A | 104(4)    |
| Br2B–C7B–C8B–C9B | 167(3)    |
| C8B–C9B–N2B–C11B | 112(7)    |

**Symmetry codes:** (i)  $-x, -y+1, -z+3$ ; (ii)  $-x+1, -y+1, -z+2$ .

**Table S2.** Hydrogen-bonding geometry (Å, °) for  $[(\text{CH}_3)_3\text{N}(\text{CH}_2)_3\text{Br}]_2\text{Pd}_2\text{Cl}_6$ .

| <i>D</i> —H··· <i>A</i>                 | <i>D</i> —H | H··· <i>A</i> | <i>D</i> ··· <i>A</i> | <i>D</i> —H··· <i>A</i> |
|-----------------------------------------|-------------|---------------|-----------------------|-------------------------|
| C1—H1 <i>A</i> ···C15                   | 0.99        | 2.84          | 3.74 (2)              | 151                     |
| C1—H1 <i>B</i> ···C15(i)                | 0.99        | 2.82          | 3.554 (19)            | 131                     |
| C3—H3 <i>A</i> ···C14                   | 0.99        | 2.95          | 3.860 (17)            | 153                     |
| C3—H3 <i>B</i> ···C11(ii)               | 0.99        | 2.90          | 3.814 (17)            | 153                     |
| C4—H4 <i>A</i> ···C14(iii)              | 0.98        | 2.85          | 3.737 (19)            | 152                     |
| C4—H4 <i>B</i> ···C11(ii)               | 0.98        | 2.81          | 3.759 (18)            | 163                     |
| C4—H4 <i>C</i> ···C16(iv)               | 0.98        | 2.91          | 3.863 (18)            | 164                     |
| C5—H5 <i>B</i> ···C15(iii)              | 0.98        | 2.94          | 3.830 (16)            | 152                     |
| C5—H5 <i>C</i> ···C16(iv)               | 0.98        | 2.98          | 3.917 (17)            | 160                     |
| C6—H6 <i>B</i> ···C12(ii)               | 0.98        | 2.79          | 3.669 (19)            | 150                     |
| C7 <i>A</i> —H7 <i>A</i> ···C13(v)      | 0.99        | 2.74          | 3.69 (5)              | 160                     |
| C7 <i>A</i> —H7 <i>B</i> ···C11(vi)     | 0.99        | 2.98          | 3.95 (5)              | 168                     |
| C7 <i>A</i> —H7 <i>B</i> ···C13(vii)    | 0.99        | 2.72          | 3.31 (5)              | 119                     |
| C8 <i>A</i> —H8 <i>A</i> ···C13(vii)    | 0.99        | 2.26          | 3.02 (3)              | 133                     |
| C9 <i>A</i> —H9 <i>B</i> ···C13(v)      | 0.99        | 2.98          | 3.63 (3)              | 125                     |
| C10 <i>A</i> —H10 <i>A</i> ···C11(ii)   | 0.98        | 2.79          | 3.44 (8)              | 124                     |
| C10 <i>A</i> —H10 <i>A</i> ···C12(ii)   | 0.98        | 2.72          | 3.67 (7)              | 163                     |
| C10 <i>A</i> —H10 <i>B</i> ···C12(vii)  | 0.98        | 2.84          | 3.66 (7)              | 141                     |
| C10 <i>A</i> —H10 <i>C</i> ···C14       | 0.98        | 2.96          | 3.83 (7)              | 148                     |
| C11 <i>A</i> —H11 <i>A</i> ···C14       | 0.98        | 2.60          | 3.52 (5)              | 157                     |
| C11 <i>A</i> —H11 <i>C</i> ···Br1(viii) | 0.98        | 3.09          | 3.66 (5)              | 119                     |
| C11 <i>A</i> —H11 <i>C</i> ···C11(ix)   | 0.98        | 2.74          | 3.65 (5)              | 156                     |
| C12 <i>A</i> —H12 <i>B</i> ···C11(ix)   | 0.98        | 2.76          | 3.65 (4)              | 151                     |
| C12 <i>A</i> —H12 <i>C</i> ···C12(ii)   | 0.98        | 2.78          | 3.69 (4)              | 153                     |
| C7 <i>B</i> —H7 <i>C</i> ···C13(v)      | 0.99        | 2.66          | 3.53 (4)              | 147                     |
| C10 <i>B</i> —H10 <i>D</i> ···C12(vii)  | 0.98        | 2.69          | 3.48 (6)              | 138                     |
| C10 <i>B</i> —H10 <i>E</i> ···C14       | 0.98        | 2.82          | 3.73 (6)              | 155                     |
| C10 <i>B</i> —H10 <i>F</i> ···C11(ii)   | 0.98        | 2.84          | 3.55 (7)              | 130                     |

|                                  |      |      |          |     |
|----------------------------------|------|------|----------|-----|
| C10B—H10F···C12 <sup>(ii)</sup>  | 0.98 | 2.96 | 3.88 (7) | 157 |
| C11B—H11D···C11 <sup>(ix)</sup>  | 0.98 | 2.88 | 3.71 (6) | 142 |
| C11B—H11E···C14                  | 0.98 | 2.88 | 3.76 (5) | 150 |
| C11B—H11F···C12 <sup>(vii)</sup> | 0.98 | 2.96 | 3.86 (6) | 152 |
| C12B—H12D···Br1 <sup>(iii)</sup> | 0.98 | 3.03 | 3.65 (3) | 123 |
| C12B—H12E···C14                  | 0.98 | 2.77 | 3.70 (4) | 158 |
| C12B—H12F···C11 <sup>(ix)</sup>  | 0.98 | 2.89 | 3.77 (4) | 150 |

**Symmetry codes:**(i)  $-x+1, y+1/2, -z+3/2$ ; (ii)  $-x, y+1/2, -z+5/2$ ; (iii)  $x, -y+3/2, z+1/2$ ; (iv)  $-x+1, -y+2, -z+2$ ; (v)  $x, -y+1/2, z-1/2$ ; (vi)  $x, y, z-1$ ; (vii)  $-x, -y+1, -z+2$ ; (viii)  $x, y-1, z$ ; (ix)  $-x, y-1/2, -z+5/2$ .

**Alert level C**

PLAT082\_ALERT\_2\_C High R1 Value ..... 0.11 Report

**Author Response:** A combination of the weak quality of the data and disordered organic molecule contribute to this alert.
